# Supplementary material
Source: publisher figshare collection journal article supplement (https://wiley.figshare.com/articles/dataset/_/3517415)
Supplement: Supplementary file 1 [file 1 › suppl-1.htm]

Ecological Archives A022-065-S1


T. E. Cox, J. Philippoff, E. Baumgartner, and C. M. Smith. 2012. Expert variability provides perspective on the strengths and weaknesses of citizen-driven intertidal monitoring program. *Ecological Applications* 22:1201–1212.

---

Supplement

Description of OPIHI (Our Project In Hawaii's Intertidal) curriculum in three parts: (1) introduction to OPIHI intertidal species identification, (2) introduction to sampling, and (3) measuring abundances.
  
*Ecological Archives* A022-065-S1.

Copyright

---

Authors  
File list (downloads)  
Description

---

Author(s)

T. E. Cox  
Department of Botany  
University of Hawai'i  
3190 Maile Way, Room 101  
Honolulu, HI 96822  
USA  
Email: erincox@hawaii.edu

J. Philippoff  
Curriculum Research & Development Group  
University of Hawai'i  
1776 University Avenue  
Honolulu, HI 96822  
USA  
Email: philippo@hawaii.edu

E. Baumgartner  
Department of Biology  
Western Oregon University  
345 N. Monmouth Ave  
Monmouth, OR 97361  
USA  
Email: baumgare@wou.edu

C. M. Smith  
Department of Botany  
University of Hawai'i  
3190 Maile Way, Room 101  
Honolulu, HI 96822  
USA  
Email: celia@hawaii.edu

---

File list

Supplement\_OPIHICurriculum.pdf (md5: b700ae7ba7cb7629bf4e1f6284e31684)

Description

Supplement\_OPIHICurriculum.pdf includes a description of OPIHI curriculum/training material in three parts: (1) An Introduction to OPIHI Intertidal Species Identification (3 pgs), (2) An Introduction to Sampling: Jellybeans in a Jar (3 pgs), and (3) Measuring Abundance: Transects and Quadrats (5 pgs)

---

ESA Publications |
Ecological Archives |
Permissions |
Citation |
Contacts
